# Supplementary material
Source: publisher figshare collection journal article supplement (https://gsapubs.figshare.com/articles/dataset/_/20075870)
Supplement: Supplementary file 1 [file 1]

Palucis, M.C., Morgan, A.M., Strauss, J.V., Rivera-Hernandez, F., Marshall, J.A., Menio, E., and Miller, R., 2022, Rates and processes controlling periglacial alluvial fan formation: Implications for martian fans: GSA Bulletin, <https://doi.org/10.1130/B36459.1>.

## Supplemental Material

**Table S1.** Channel parameters and sediment flux during August 17th 2019 storm conditions.

**Table S2.** Channel parameters and sediment flux under bankfull conditions.
